# Supplementary material
Source: publisher figshare collection journal article supplement (https://karger.figshare.com/articles/dataset/_/5129761)
Supplement: Supplementary file 1 [file 1]

1 **Supplementary Data**

2 **Table 1. Bioinformatic Analysis of SOX9 up 7 MatInspector**

| Matrix  | Detailed Matrix Information          | Anchor | Strand | Matrix Similarity | Sequence                |
|---------|--------------------------------------|--------|--------|-------------------|-------------------------|
| SF1.01  | SF1 steroidogenic factor 1           | 1498   | (-)    | 1                 | ccctCAAGgtcacct         |
| SF1.01  | SF1 steroidogenic factor 1           | 1521   | (+)    | 0.996             | ggtgCAAGgtcagag         |
| SF1.01  | SF1 steroidogenic factor 1           | 1096   | (-)    | 0.993             | actcCAAGgccatca         |
| SOX3.01 | SRY-box containing gene 3            | 2436   | (-)    | 0.99              | atctcaCAAagggaacatgtat  |
| SOX5.01 | Sox-5                                | 2202   | (-)    | 0.986             | tccaaaCAATttaaagtggcatc |
| SOX5.01 | Sox-5                                | 737    | (+)    | 0.984             | ataaaaCAATcagggttctgttt |
| SOX6.01 | SRY (sex determining region Y)-box 6 | 1452   | (+)    | 0.98              | tctgtACAAagacctaattatag |
| SF1.01  | SF1 steroidogenic factor 1           | 1403   | (-)    | 0.958             | tcacCAAGgcaatat         |

3

4 **Table 2: Bioinformatic Analysis of SOX9 up 7 JASPAR**

| Matrix | Score  | Relative score | Start | End | Strand | Predicted site sequence |
|--------|--------|----------------|-------|-----|--------|-------------------------|
| Sox17  | 10.360 | 0.9580037      | 306   | 314 | 1      | CATATTGTC               |
| SOX10  | 8.910  | 1.00000919     | 400   | 405 | 1      | CTTTGT                  |
| SOX10  | 8.625  | 0.98735660     | 676   | 681 | 1      | CATTGT                  |

|       |        |             |      |      |    |            |
|-------|--------|-------------|------|------|----|------------|
| SRY   | 8.994  | 0.91067981  | 677  | 685  | -1 | TTTTACAAT  |
| Sox17 | 9.669  | 0.93568096  | 712  | 720  | 1  | TCTATTGTG  |
| SOX9  | 9.595  | 0.90244614  | 713  | 721  | 1  | CTATTGTGC  |
| SRY   | 10.762 | 0.969871586 | 727  | 735  | 1  | TAAAACAAT  |
| Sox5  | 10.898 | 0.999999093 | 729  | 735  | -1 | ATTGTTT    |
| SOX10 | 7.097  | 0.91952100  | 773  | 778  | 1  | CTGTGT     |
| SOX10 | 8.910  | 1.00000919  | 1446 | 1451 | -1 | CTTTGT     |
| Sox3  | 9.114  | 0.9005362   | 2073 | 2082 | -1 | CTTTTGTTGT |
| Sox3  | 11.463 | 0.93530231  | 2080 | 2089 | -1 | GTTTTGTCTT |
| Sox6  | 9.753  | 0.90040453  | 2080 | 2089 | -1 | GTTTTGTCTT |
| SRY   | 9.093  | 0.9139942   | 2204 | 2212 | -1 | CCAAACAAT  |
| Sox5  | 10.898 | 0.9999990   | 2204 | 2210 | 1  | ATTGTTT    |
| SOX10 | 7.097  | 0.9195210   | 2411 | 2416 | -1 | CTGTGT     |
| Sox2  | 12.638 | 0.9764408   | 2436 | 2443 | 1  | CCTTTGTG   |
| SOX10 | 8.910  | 1.000009    | 2437 | 2442 | 1  | CTTTGT     |

5

6

7

8 **Table 3: Bioinformatic Analysis of SOX9 up 1 MatInspector**

| Matrix   | Detailed Matrix Information           | Anchor | Strand | Matrix Similarity | Sequence                |
|----------|---------------------------------------|--------|--------|-------------------|-------------------------|
| SOX5.01  | Sox-5                                 | 361    | (+)    | 0.997             | ttcaaaCAATacagtctttacaa |
| SOX6.01  | SRY (sex determining region Y)-box 6  | 626    | (+)    | 0.994             | acaaaACAAagaacaaacaaaa  |
| SOX6.01  | SRY (sex determining region Y)-box 6  | 31     | (+)    | 0.978             | ctgtgACAAagagcatcctttgc |
| SRY.01   | Sex-determining region Y gene product | 616    | (+)    | 0.933             | ggaaaACAAaacaacaaagaa   |
| SOX4.01  | SRY-related HMG-box gene 4            | 638    | (+)    | 0.91              | aacaaACAAaaaaaccacaaaa  |
| SOX15.01 | SRY-related HMG-box gene 15           | 165    | (+)    | 0.884             | tatagACAAttacaagtctcaa  |

9

10 **Table 4: Bioinformatic Analysis of SOX9 up 1 JASPAR**

| Model name | Score  | Relative score | Start | End | Strand | Predicted site sequence |
|------------|--------|----------------|-------|-----|--------|-------------------------|
| SOX10      | 8.910  | 1.00000        | 25    | 30  | -1     | CTTTGT                  |
| Sox17      | 9.118  | 0.91788        | 158   | 166 | -1     | TAAATTGTC               |
| SRY        | 9.653  | 0.93274        | 351   | 359 | 1      | TCAAACAAT               |
| SOX9       | 9.679  | 0.90485        | 353   | 361 | -1     | GTATTGTTT               |
| Sox5       | 10.898 | 0.99999        | 353   | 359 | -1     | ATTGTTT                 |

|       |        |         |     |     |    |            |
|-------|--------|---------|-----|-----|----|------------|
| SOX10 | 8.625  | 0.98735 | 369 | 374 | -1 | CATTGT     |
| SRY   | 9.754  | 0.93612 | 606 | 614 | 1  | GAAAACAAA  |
| Sox3  | 12.130 | 0.94517 | 607 | 616 | -1 | GTTTTGTTTT |
| Sox6  | 9.914  | 0.90347 | 607 | 616 | -1 | GTTTTGTTTT |
| SRY   | 8.914  | 0.90800 | 611 | 619 | 1  | CAAAACAAA  |
| Sox3  | 12.130 | 0.94517 | 612 | 621 | -1 | GTTTTGTTTT |
| Sox6  | 9.914  | 0.90347 | 612 | 621 | -1 | GTTTTGTTTT |
| SRY   | 8.914  | 0.90800 | 616 | 624 | 1  | CAAAACAAA  |
| Sox3  | 13.315 | 0.96271 | 617 | 626 | -1 | TCTTTGTTTT |
| Sox6  | 12.882 | 0.96003 | 617 | 626 | -1 | TCTTTGTTTT |
| SOX10 | 8.910  | 1.00000 | 620 | 625 | -1 | CTTTGT     |
| Sox3  | 10.398 | 0.91953 | 629 | 638 | -1 | TTTTTGTTTG |

- 11
- 12 **Table 5: Bioinformatic Analysis of SOX9 up 2 MatInspector**

| Matrix  | Detailed Matrix Information | Anchor | Strand | Matrix Similarity | Sequence                |
|---------|-----------------------------|--------|--------|-------------------|-------------------------|
| SOX5.01 | Sox-5                       | 810    | (+)    | 0.99              | ccacaaCAATaagaactgtgata |
| SOX5.01 | Sox-5                       | 1752   | (-)    | 0.989             | ctctaaCAATgccgctgctctt  |

|          |                                      |      |     |       |                          |
|----------|--------------------------------------|------|-----|-------|--------------------------|
| SOX5.01  | Sox-5                                | 156  | (+) | 0.989 | gggtaaCAATgaacaagtaatat  |
| SOX3.01  | SRY-box containing gene 3            | 1616 | (-) | 0.988 | gagccaCAAAGgggaaattcatct |
| SOX30.01 | SRY-related HMG-box gene 30          | 318  | (+) | 0.988 | gatgaACAAtgaaactattttca  |
| SOX5.01  | Sox-5                                | 17   | (-) | 0.988 | caaaaaCAATtctgagtggtaa   |
| SOX5.01  | Sox-5                                | 1001 | (+) | 0.987 | ggaaaaCAATgtgaacagctgta  |
| SOX6.01  | SRY (sex determining region Y)-box 6 | 723  | (+) | 0.972 | aattcACAAagaccaatagcaaa  |
| SOX3.01  | SRY-box containing gene 3            | 1181 | (+) | 0.971 | tttcaaCAAAGatgaagggaag   |
| HBP1.01  | HMG box-containing protein 1         | 1538 | (+) | 0.967 | gttgattgAATGaacaaatggat  |
| SOX3.01  | SRY-box containing gene 3            | 1546 | (+) | 0.954 | aatgaaCAAAtggattaattaat  |

13

14 **Table 6: Bioinformatic Analysis of SOX9 up 2 JASPAR**

| Model name | Score  | Relative score | Start | End | Strand | Predicted site sequence |
|------------|--------|----------------|-------|-----|--------|-------------------------|
| SRY        | 10.202 | 0.95112        | 19    | 27  | -1     | AAAAACAAT               |
| Sox5       | 10.898 | 0.99999        | 19    | 25  | 1      | ATTGTTT                 |
| SRY        | 9.706  | 0.93451        | 146   | 154 | 1      | GGTAACAAT               |
| SOX9       | 9.602  | 0.90264        | 148   | 156 | -1     | TCATTGTTA               |

|       |        |         |     |     |    |            |
|-------|--------|---------|-----|-----|----|------------|
| Sox5  | 10.898 | 0.99999 | 148 | 154 | -1 | ATTGTTA    |
| Sox17 | 9.890  | 0.94282 | 149 | 157 | -1 | TTCATTGTT  |
| SOX10 | 8.625  | 0.98735 | 150 | 155 | -1 | CATTGT     |
| SRY   | 8.904  | 0.90766 | 308 | 316 | 1  | ATGAACAAT  |
| Sox6  | 10.607 | 0.91668 | 309 | 318 | -1 | TCATTGTTCA |
| SOX9  | 10.639 | 0.93241 | 310 | 318 | -1 | TCATTGTTC  |
| Sox5  | 9.767  | 0.95785 | 310 | 316 | -1 | ATTGTTC    |
| Sox17 | 9.890  | 0.94282 | 311 | 319 | -1 | TTCATTGTT  |
| SOX10 | 8.625  | 0.98735 | 312 | 317 | -1 | CATTGT     |
| SOX10 | 7.094  | 0.91938 | 337 | 342 | -1 | CCTTGT     |
| SOX10 | 7.097  | 0.91952 | 636 | 641 | 1  | CTGTGT     |
| SOX10 | 8.910  | 1.00000 | 717 | 722 | -1 | CTTTGT     |
| Sox5  | 10.075 | 0.96933 | 802 | 808 | -1 | ATTGTTG    |
| Sox17 | 8.990  | 0.91374 | 803 | 811 | -1 | CTTATTGTT  |
| SRY   | 11.042 | 0.97924 | 991 | 999 | 1  | GAAAACAAT  |

|       |        |         |      |      |    |            |
|-------|--------|---------|------|------|----|------------|
| Sox6  | 10.809 | 0.92053 | 992  | 1001 | -1 | ACATTGTTTT |
| Sox5  | 10.898 | 0.99999 | 993  | 999  | -1 | ATTGTTT    |
| Sox17 | 9.490  | 0.92989 | 994  | 1002 | -1 | CACATTGTT  |
| SOX10 | 8.625  | 0.98735 | 995  | 1000 | -1 | CATTGT     |
| SOX10 | 7.097  | 0.91952 | 1119 | 1124 | 1  | CTGTGT     |
| SOX10 | 7.097  | 0.91952 | 1270 | 1275 | 1  | CTGTGT     |
| Sox2  | 12.638 | 0.97644 | 1616 | 1623 | 1  | CCTTTGTG   |
| SOX10 | 8.910  | 1.00000 | 1617 | 1622 | 1  | CTTTGT     |
| SOX9  | 9.976  | 0.91338 | 1752 | 1760 | 1  | CAATTGTTA  |
| SRY   | 9.126  | 0.91509 | 1754 | 1762 | -1 | TCTAACAAT  |
| Sox5  | 10.898 | 0.99999 | 1754 | 1760 | 1  | ATTGTTA    |

15

16 **Table 7: Bioinformatic Analysis of NEIL2 I MatInspector**

| Matrix   | Detailed Matrix Information | Anchor | Strand | Matrix Similarity | Sequence                |
|----------|-----------------------------|--------|--------|-------------------|-------------------------|
| SOX12.01 | SRY-related HMG-box gene 12 | 2424   | (+)    | 1                 | tcagaACAAttacattagcctac |

|         |                                      |      |     |       |                         |
|---------|--------------------------------------|------|-----|-------|-------------------------|
| SOX5.01 | Sox-5                                | 849  | (-) | 0.995 | ttgaaaCAATactggcaacacat |
| SOX6.01 | SRY (sex determining region Y)-box 6 | 1598 | (-) | 0.993 | aagagACAAagcaaagtaaact  |
| SOX6.01 | SRY (sex determining region Y)-box 6 | 2463 | (+) | 0.98  | ctaacACAAagcttgttctataa |
| SOX6.01 | SRY (sex determining region Y)-box 6 | 1641 | (-) | 0.98  | gaccaACAAagtagataaactca |
| SOX3.01 | SRY-box containing gene 3            | 446  | (-) | 0.959 | aaaataCAAagttagccggtgt  |
| SOX9.01 | SOX (SRY-related HMG box)            | 2605 | (-) | 0.918 | gacttaCAATgggtcacttttaa |

17

18 **Table 8: Bioinformatic Analysis of NEIL2 | JASPAR**

| Model name | Score  | Relative score | Start | End | Strand | Predicted site sequence |
|------------|--------|----------------|-------|-----|--------|-------------------------|
| Sox17      | 8.590  | 0.90082        | 199   | 207 | 1      | TATATTGTT               |
| SRY        | 9.093  | 0.91399        | 202   | 210 | -1     | ACAAACAAT               |
| Sox5       | 10.898 | 0.99999        | 202   | 208 | 1      | ATTGTTT                 |
| Sox3       | 13.700 | 0.96841        | 288   | 297 | 1      | GCTTTGTTTT              |
| Sox6       | 12.730 | 0.95714        | 288   | 297 | 1      | GCTTTGTTTT              |
| SOX10      | 8.910  | 1.00000        | 289   | 294 | 1      | CTTTGT                  |
| SRY        | 8.914  | 0.90800        | 290   | 298 | -1     | CAAAACAAA               |
| SOX10      | 6.812  | 0.90686        | 657   | 662 | 1      | CAGTGT                  |



|       |        |         |      |      |    |            |
|-------|--------|---------|------|------|----|------------|
| SRY   | 8.914  | 0.90800 | 824  | 832  | -1 | AAAAACAAA  |
| SOX9  | 9.679  | 0.90485 | 849  | 857  | 1  | GTATTGTTT  |
| Sox6  | 10.034 | 0.90576 | 849  | 858  | 1  | GTATTGTTTC |
| SRY   | 9.953  | 0.94278 | 851  | 859  | -1 | TGAAACAAT  |
| Sox5  | 10.898 | 0.99999 | 851  | 857  | 1  | ATTGTTT    |
| Sox3  | 12.445 | 0.94983 | 1598 | 1607 | 1  | GCTTTGTCTC |
| Sox6  | 11.846 | 0.94029 | 1598 | 1607 | 1  | GCTTTGTCTC |
| SOX10 | 8.910  | 1.00000 | 1599 | 1604 | 1  | CTTTGT     |
| SOX10 | 8.910  | 1.00000 | 1642 | 1647 | 1  | CTTTGT     |
| Sox5  | 9.767  | 0.95785 | 2416 | 2422 | -1 | ATTGTTC    |
| Sox3  | 11.615 | 0.93755 | 2454 | 2463 | -1 | GCTTTGTGTT |
| SOX10 | 8.910  | 1.00000 | 2457 | 2462 | -1 | CTTTGT     |
| SOX9  | 9.628  | 0.90339 | 2605 | 2613 | 1  | CCATTGTAA  |
| SOX10 | 8.625  | 0.98735 | 2606 | 2611 | 1  | CATTGT     |

19

20
